# Supplementary material
Source: publisher figshare collection journal article supplement (https://acs.figshare.com/ndownloader/files/3835792)
Supplement: Supplementary file 1 [file 3835792]

52
Structure AIr, electronic energy:  -1062.77687310
77  -1.548118   -0.006654  -0.233005
77  1.548110   0.006708  -0.233070
6  -3.164783   -1.382207  -0.264794
6  -2.513178   -1.405324  1.004275
6  -3.052552   -0.764277  2.270215
1  -3.876995   -1.366686  2.696297
1  -2.240896   -0.782332  3.014770
6  -3.496541   0.693748  2.041210
1  -4.570500   0.740716  1.804219
1  -3.370179   1.268561  2.971075
6  -2.690218   1.353546  0.923845
6  -3.116301   1.382327  -0.437706
6  -4.382005   0.730899  -0.964759
1  -4.325201   0.752341  -2.064644
1  -5.274206   1.324605  -0.689628
6  -4.526817   -0.729682  -0.494099
1  -5.125907   -0.783320  0.427857
1  -5.084975   -1.305954  -1.247251
6  3.116289   -1.382221  -0.438155
6  2.690251   -1.353764  0.923419
6  3.496608   -0.694230  2.040916
1  4.570560   -0.741153  1.803890
1  3.370264   -1.269257  2.970652
6  3.052638   0.763746  2.270270
1  2.241010   0.781633  3.014860
1  3.877101   1.366052  2.696461
6  2.513218   1.405090  1.004498
6  3.164772   1.382271  -0.264603
6  4.526799   0.729806  -0.494120
1  5.084917   1.306252  -1.247169
1  5.125933   0.783242  0.427818
6  4.381975   -0.730670  -0.965101
1  4.325140   -0.751866  -2.064989
1  5.274186   -1.324435  -0.690131
1  2.929565   2.201251  -0.954772
1  -2.929608   -2.201028  -0.955162
1  -1.836120   -2.247245  1.194897
1  -2.777660   2.232484  -1.042606
1  2.777627   -2.232236  -1.043244
1  2.041700   -2.174806  1.251018
1  1.836168   2.246968  1.195345
1  -2.041654   2.174509  1.251616
8  -0.004503   1.279991  -0.836020
8  0.004470   -1.279797  -0.836318
6  0.010580   -2.681742  -0.799157
1  -0.947421   -3.077494  -1.175651
1  0.812210   -3.076379  -1.446594
1  0.167751   -3.079700  0.220960
6  -0.010617   2.681927  -0.798534
1  -0.812239   3.076712  -1.445891
1  -0.167805   3.079647  0.221673
1  0.947388   3.077770  -1.174921
56
Structure TSA/BIr electronic energy:  -1119.29973138
77  -1.489881   -0.321468  0.004738
77  1.457758   -0.316636  -0.028522
6  -1.948404   1.308888  -1.239040
6  -2.925580   0.262628  -1.392115
6  -4.321643   0.313101  -0.789916
1  -4.973385   1.010390  -1.350152
1  -4.766335   -0.687308  -0.916006
6  -2.981104   0.258296  1.376461
6  -1.845315   1.135978  1.461745
6  -1.785757   2.557718  0.934668
1  -0.733647   2.878510  0.997901
1  -2.365030   3.246317  1.579338
6  3.044713   -0.287792  1.349077
6  2.371396   0.972984  1.374521
6  2.450661   2.445870  -0.684540
1  1.505819   3.012896  -0.664205
1  3.164959   3.054393  -1.271127
6  2.160810   1.126091  -1.376571
6  3.038596   -0.001989  -1.402645
6  4.386324   -0.535125  0.681511
1  4.546236   -1.625017  0.665629
1  5.212052   -0.110565  1.284003
1  2.931120   -0.685060  -2.253785
1  -1.190778   1.387004  -2.025835
1  -2.861280   -0.338048  -2.309232
1  -1.178887   0.971049  2.314887
1  2.835331   -0.973918  2.179239
1  1.682266   1.146070  2.209445
1  1.460341   1.221039  -2.215064
1  -3.086275   -0.474282  2.186751
8  0.062388   -1.243419  1.259730
8  0.020305   -1.123746  -1.339148
6  0.011298   -1.044545  -2.733888
1  -0.833504   -1.630351  -3.143649
1  -0.091170   -0.011976  -3.118430
1  0.944135   -1.463289  -3.151693
6  0.109616   -1.255704  2.657715
1  0.862092   -1.984904  3.009797
1  0.368435   -0.275281  3.099707
1  -0.871237   -1.555434  3.071720
6  -2.245797   2.628179  -0.527251
1  -1.730350   3.450337  -1.047079
1  -3.320570   2.857507  -0.592547
6  -4.298738   0.668118  0.712351
1  -4.469151   1.746835  0.858084
1  -5.135414   0.166036  1.221597
6  4.426782   0.002806  -0.762675
1  4.844961   1.021090  -0.786377
1  5.109430   -0.613660  -1.367110
6  2.949289   2.246608  0.759287
1  2.659676   3.113077  1.373241
1  4.049227   2.212892  0.789847
1  -1.583251   -3.099387  -0.983372
1  -1.071165   -2.964770  0.569264
1  -2.680537   -3.295327  0.251008
7  -1.857873   -2.778317  -0.055890
56
Structure BIr electronic energy:  -1119.30844428
77  -1.752099   -0.149072  -0.389008
77  1.652971   -0.067302  -0.165241
6  -1.908130   -0.038507  1.748298
6  -1.766939   1.261016  1.205356
6  -2.897233   2.261207  1.039605
1  -3.167587   2.706194  2.016261
1  -2.510935   3.088417  0.423130
6  -3.711344   0.511565  -0.601079
6  -3.668952   -0.885110  -0.171205
6  -4.010792   -1.360428  1.232011
1  -3.737369   -2.426767  1.290919
1  -5.099255   -1.310770  1.427453
6  3.214957   -1.453509  0.107036
6  2.809898   -0.951774  1.379289
6  3.200175   1.502649  1.890745
1  2.397656   1.786002  2.590912
1  4.032332   2.208980  2.073575
6  2.646965   1.667855  0.486195
6  3.279833   1.193942  -0.701199
6  4.477611   -1.041174  -0.628440
1  4.405927   -1.446211  -1.650774
1  5.371731   -1.508787  -0.173652
1  3.038451   1.723009  -1.631205
1  -0.997700   -0.489544  2.156221
1  -0.764815   1.701369  1.260342
1  -3.939473   -1.627693  -0.938542
1  2.860178   -2.456908  -0.162193
1  2.172472   -1.605981  1.985244
1  1.987013   2.537392  0.379303
1  -4.012812   0.680928  -1.645188
8  0.118293   -1.457703  -0.219574
8  0.123200   0.926172  -1.153257
6  0.069728   2.287307  -1.463674
1  -0.759912   2.483800  -2.169649
1  -0.106823   2.923437  -0.574242
1  1.006241   2.634674  -1.938838
6  0.043818   -2.636596  0.527816
1  0.960846   -3.246326  0.423963
1  -0.110314   -2.451238  1.608736
1  -0.808265   -3.252236  0.181215
6  -3.223836   -0.579200  2.301829
1  -3.012621   -1.230405  3.163758
1  -3.826360   0.253951  2.695487
6  -4.125948   1.645589  0.343078
1  -4.851852   1.275748  1.085348
1  -4.655326   2.427424  -0.222918
6  4.636002   0.490641  -0.702693
1  5.249292   0.857605  0.134864
1  5.187900   0.760429  -1.616116
6  3.634921   0.052809  2.182377
1  3.521369   -0.156868  3.256944
1  4.705506   -0.082428  1.963713
1  -1.032680   -1.789381  -2.282897
7  -1.540726   -0.907054  -2.386704
1  -2.345199   -1.033297  -3.001908
1  -0.876006   -0.241765  -2.794550
56
Structure TSB/CIr electronic energy -1119.30555960
77  1.758216   0.170856  -0.407849
77  -1.624945   0.164626  -0.185583
6  1.576344   -0.954086  1.395656
6  1.999450   -1.798743  0.334846
6  3.414811   -2.307673  0.135622
1  3.652179   -3.106900  0.863267
1  3.455324   -2.775577  -0.860818
6  3.852372   0.159897  -0.248278
6  3.283991   1.110631  0.667184
6  3.137902   0.900179  2.164262
1  2.480854   1.701446  2.538710
1  4.105435   1.026503  2.686387
6  -3.297658   1.234080  0.511573
6  -2.732203   0.489440  1.589251
6  -2.791022   -2.044917  1.501888
1  -1.900272   -2.373748  2.061792
1  -3.514338   -2.880725  1.557003
6  -2.354570   -1.796136  0.068971
6  -3.143729   -1.135719  -0.918398
6  -4.564731   0.851228  -0.231714
1  -4.622876   1.489918  -1.127779
1  -5.462757   1.084200  0.371844
1  -2.934576   -1.392380  -1.963569
1  0.510770   -0.987672  1.651949
1  1.226982   -2.434591  -0.110461
1  3.374878   2.171069  0.389445
1  -3.078221   2.308891  0.485348
1  -2.114377   1.049111  2.300180
1  -1.616452   -2.521778  -0.294204
1  4.309604   0.571939  -1.157446
8  -0.322060   1.756655  0.001583
8  -0.052816   -0.432250  -1.439422
6  -0.067656   -1.507778  -2.336497
1  0.779287   -1.426653  -3.042307
1  0.016097   -2.492675  -1.838018
1  -1.002010   -1.512250  -2.924907
6  -0.256292   2.608957  1.102280
1  -1.195231   3.175649  1.266337
1  -0.026163   2.072411  2.044507
1  0.550373   3.355721  0.956309
6  2.506116   -0.465560  2.503625
1  1.939181   -0.385952  3.443463
1  3.288583   -1.217952  2.688670
6  4.452864   -1.172536  0.204156
1  4.852301   -1.070566  1.225173
1  5.316289   -1.421105  -0.431591
6  -4.562477   -0.628683  -0.665108
1  -5.056385   -1.255876  0.092935
1  -5.160538   -0.744462  -1.581957
6  -3.364920   -0.776896  2.164426
1  -3.184126   -0.813609  3.249620
1  -4.458462   -0.737712  2.045391
1  1.313029   1.424615  -2.759044
1  0.770736   2.199190  -1.389474
1  2.353569   2.459178  -1.971565
7  1.605272   1.777272  -1.847237
56
Structure CIr electronic energy -1119.30482897
77  1.662730   -0.354555  -0.089519
77  -1.703905   -0.292749  0.048080
6  3.478777   -0.177338  -1.185415
6  2.567499   0.863052  -1.538335
6  2.657310   2.306828  -1.081260
1  3.442411   2.848157  -1.642102
1  1.702895   2.789318  -1.345437
6  2.880372   2.435622  0.438740
1  3.954981   2.501043  0.668883
1  2.439749   3.379503  0.793288
6  2.257783   1.272445  1.203756
6  2.957353   0.086551  1.537413
6  4.400078   -0.213465  1.176427
1  4.577613   -1.277642  1.398237
1  5.085895   0.356787  1.831105
6  4.707928   0.052737  -0.308890
1  5.080980   1.078768  -0.450487
1  5.522826   -0.609146  -0.638618
6  -3.707748   -0.140513  -0.560249
6  -2.879081   0.547765  -1.491937
6  -2.777819   2.067792  -1.582381
1  -3.725907   2.527194  -1.263721
1  -2.641071   2.363356  -2.634034
6  -1.604236   2.607751  -0.739150
1  -0.687736   2.602319  -1.351796
1  -1.779549   3.662929  -0.454890
6  -1.320653   1.753447  0.482149
6  -2.297843   1.266981  1.388354
6  -3.786218   1.598909  1.291443
1  -4.206664   1.683521  2.305245
1  -3.917570   2.590036  0.831057
6  -4.562508   0.526457  0.500143
1  -4.897601   -0.262688  1.192435
1  -5.480356   0.954978  0.054489
1  -1.951194   1.027878  2.400100
1  3.580079   -1.002342  -1.902029
1  2.041599   0.752158  -2.497360
1  2.606350   -0.457763  2.420962
1  -4.046684   -1.138852  -0.860981
1  -2.640839   0.003290  -2.413427
1  -0.301986   1.862426  0.863338
1  1.422884   1.542397  1.857153
8  0.045493   -0.992480  1.100222
8  -1.626106   -2.093283  -0.964981
6  -1.757303   -3.262706  -0.209076
1  -1.512858   -4.148198  -0.831687
1  -1.089130   -3.282911  0.676335
1  -2.794405   -3.405895  0.157773
6  0.030233   -0.936942  2.505362
1  0.825390   -1.577294  2.925876
1  0.172415   0.086666  2.900772
1  -0.935298   -1.311976  2.883758
7  0.891388   -1.679355  -1.598078
1  0.973081   -1.314828  -2.549329
1  1.432101   -2.546211  -1.570413
1  -0.140279   -1.925247  -1.421598
56
Structure TSC/DIr electronic energy -1119.28236507
77  1.517542   -0.326461  -0.115043
77  -1.541130   -0.238916  -0.012290
6  3.188725   -0.039925  -1.382899
6  2.331755   1.102401  -1.408323
6  2.615238   2.416392  -0.704772
1  3.387763   2.992665  -1.248324
1  1.694732   3.018773  -0.755542
6  3.013417   2.227899  0.774007
1  4.109103   2.184209  0.874502
1  2.695547   3.108903  1.352009
6  2.390413   0.974999  1.381631
6  3.030628   -0.289025  1.385138
6  4.394633   -0.581670  0.786154
1  4.521886   -1.675901  0.784789
1  5.199489   -0.178773  1.430033
6  4.532460   -0.056007  -0.656302
1  4.969129   0.954940  -0.659415
1  5.241742   -0.688792  -1.211140
6  -3.405247   0.138244  -0.952333
6  -2.424047   1.013947  -1.489778
6  -2.351023   2.502305  -1.156394
1  -3.361176   2.880312  -0.935159
1  -2.011210   3.057628  -2.043769
6  -1.398314   2.772540  0.024350
1  -0.386355   2.964591  -0.363599
1  -1.698089   3.684250  0.574777
6  -1.291502   1.577788  0.954273
6  -2.425213   0.873208  1.512444
6  -3.872393   1.297550  1.255350
1  -4.477652   1.102487  2.153493
1  -3.917327   2.386188  1.094601
6  -4.467555   0.541435  0.053751
1  -4.945372   -0.384938  0.409881
1  -5.265600   1.132436  -0.434396
1  -2.267140   0.395404  2.486921
1  3.125559   -0.716269  -2.244117
1  1.686828   1.214738  -2.290792
1  2.746249   -0.981011  2.187164
1  -3.656600   -0.745019  -1.548025
1  -1.994200   0.729426  -2.457774
1  -0.379421   1.589236  1.560538
1  1.662236   1.160311  2.178036
8  -0.014428   -1.172036  1.110214
8  -1.904898   -2.348640  -0.973581
6  -1.703598   -3.499280  -0.172659
1  -1.578837   -4.397710  -0.803697
1  -0.826082   -3.385210  0.484612
1  -2.595601   -3.640550  0.456179
6  -0.001628   -1.195308  2.514022
1  0.860008   -1.781587  2.876420
1  0.063584   -0.186965  2.963161
1  -0.920955   -1.676188  2.890861
7  0.336673   -1.177822  -1.652784
1  0.428394   -0.684643  -2.544376
1  0.809709   -2.076754  -1.806703
1  -1.046668   -2.076981  -1.436067
56
Structure DIr electronic energy -1119.31186604
77  1.575198   0.305831  -0.113476
77  -1.347089   -0.035885  -0.093691
6  3.235131   0.470542  1.249517
6  2.493803   -0.707386  1.522491
6  2.896374   -2.109597  1.104659
1  3.686049   -2.507246  1.769990
1  2.016019   -2.755641  1.251196
6  2.614325   -1.150384  -1.232266
6  3.136483   0.148539  -1.516254
6  4.443198   0.697262  -0.973274
1  4.453908   1.779110  -1.181625
1  5.306783   0.270186  -1.517915
6  -2.983560   0.022407  1.280561
6  -2.256632   -1.173378  1.502012
6  -1.947666   -1.695858  -1.228706
6  -2.887785   -0.641939  -1.430716
6  -4.304762   0.121461  0.539337
1  -4.493756   1.189801  0.351019
1  -5.137574   -0.235125  1.174205
1  -2.799400   -0.084661  -2.370684
1  3.054047   1.328158  1.908679
1  1.816521   -0.680031  2.384181
1  2.831488   0.601350  -2.468580
1  -2.810058   0.841678  1.989223
1  -1.563971   -1.183648  2.351114
1  -1.222814   -1.866993  -2.035846
1  1.937404   -1.578565  -1.982441
8  -0.000165   1.144095  1.018853
6  -0.030825   1.377317  2.402571
1  0.904053   1.864860  2.726865
1  -0.869063   2.051295  2.651422
1  -0.153149   0.447457  2.987647
6  3.337285   -2.185392  -0.371317
1  4.425831   -2.048563  -0.458990
1  3.130448   -3.192939  -0.762769
6  4.589649   0.474477  0.545834
1  5.219906   1.268521  0.974225
1  5.118783   -0.468679  0.749866
6  -4.284029   -0.625618  -0.809601
1  -4.649180   -1.657026  -0.689366
1  -4.983127   -0.138259  -1.505196
6  -2.166372   -2.912420  -0.348751
1  -1.185863   -3.398443  -0.220487
1  -2.815425   -3.652284  -0.854404
6  -2.732091   -2.546606  1.038687
1  -2.420213   -3.305554  1.771972
1  -3.832037   -2.575128  1.027427
7  0.050160   0.643873  -1.516961
1  -0.110702   1.643982  -1.669324
1  0.086555   0.201802  -2.436907
6  -2.192273   3.621978  0.108288
1  -2.901347   3.444030  0.942651
1  -1.171923   3.432663  0.489482
1  -2.267301   4.685172  -0.169104
8  -2.491344   2.851290  -1.032021
1  -2.345894   1.910256  -0.800077
50
Structure EIr electronic energy -1003.65403575
77  1.456406   -0.266201  -0.287002
77  -1.456404   -0.266200  -0.286999
7  0.000000   -0.130459  -1.802724
6  2.363786   0.007016  1.643477
6  3.067500   -0.983443  0.909978
6  3.028508   0.817345  -1.212128
6  2.114883   1.701500  -0.560140
6  -3.067504   -0.983445  0.909973
6  -2.363793   0.007012  1.643478
6  -2.114882   1.701502  -0.560135
6  -3.028504   0.817348  -1.212129
1  1.663001   -0.344936  2.408622
1  2.866334   -2.028479  1.178018
1  2.939699   0.744608  -2.302707
1  1.409665   2.242026  -1.206084
1  -2.866336   -2.028481  1.178011
1  -1.663011   -0.344941  2.408625
1  -1.409661   2.242029  -1.206075
1  -2.939690   0.744612  -2.302708
1  -0.000001   -0.992255  -2.353826
1  -0.000001   0.653159  -2.457456
6  -4.402926   -0.772335  0.219254
6  -2.354853   2.392242  0.769598
1  -1.386006   2.802571  1.097503
1  -3.033939   3.257645  0.648943
1  -4.584453   -1.654674  -0.414684
1  -5.228448   -0.747150  0.955936
6  4.402926   -0.772333  0.219264
6  2.354849   2.392244  0.769593
1  5.228445   -0.747146  0.955949
1  4.584455   -1.654673  -0.414672
1  1.386002   2.802574  1.097493
1  3.033936   3.257646  0.648937
8  0.000001   -1.717022  0.227486
6  0.000000   -2.517788  1.379648
1  0.891469   -3.168417  1.390489
1  0.000005   -1.924519  2.313090
1  -0.891475   -3.168409  1.390493
6  -4.417162   0.492696  -0.662182
1  -4.804433   1.354639  -0.096997
1  -5.116441   0.347895  -1.499644
6  -2.883546   1.426913  1.849863
1  -2.576690   1.786512  2.843755
1  -3.984189   1.423392  1.859255
6  4.417165   0.492696  -0.662174
1  5.116448   0.347895  -1.499632
1  4.804431   1.354641  -0.096988
6  2.883538   1.426917  1.849861
1  3.984181   1.423396  1.859258
1  2.576678   1.786518  2.843752
54
Structure TSE/FIr electronic energy -1060.17507379
77  -1.443318   -0.258476  -0.157905
77  1.462819   -0.328590  -0.183990
6  -1.939486   1.598070  -0.994328
6  -2.874296   0.593973  -1.419135
6  -4.285770   0.441713  -0.879136
1  -4.959643   1.212580  -1.300085
1  -4.665181   -0.528286  -1.238107
6  -3.035971   -0.079643  1.272350
6  -1.938018   0.749018  1.638597
6  -1.866636   2.253136  1.448699
1  -0.819327   2.546694  1.623960
1  -2.471970   2.777802  2.212393
6  3.087623   -0.611394  1.159083
6  2.409246   0.587532  1.509842
6  2.410201   2.515036  -0.144964
1  1.452842   3.031676  0.031864
1  3.096736   3.271005  -0.571907
6  2.135262   1.403311  -1.141071
6  3.027327   0.329499  -1.452286
6  4.414657   -0.676345  0.424021
1  4.577688   -1.727797  0.138605
1  5.252572   -0.405201  1.094704
1  2.917816   -0.119425  -2.446795
1  -1.175279   1.892321  -1.724549
1  -2.755076   0.219781  -2.444614
1  -1.297496   0.384183  2.448701
1  2.884804   -1.489847  1.784834
1  1.727546   0.540173  2.366291
1  1.428568   1.696688  -1.929618
1  -3.139186   -1.020165  1.827511
8  0.041400   -1.531477  0.834461
6  0.077080   -1.856982  2.196475
1  0.825700   -2.648480  2.382805
1  0.333856   -0.997899  2.842992
1  -0.908015   -2.236403  2.526561
6  -2.275497   2.682697  0.028506
1  -1.752746   3.613381  -0.240251
1  -3.350097   2.918218  -0.015010
6  -4.329478   0.458123  0.663090
1  -4.520941   1.477421  1.033525
1  -5.178989   -0.148226  1.013311
6  4.424460   0.197542  -0.845821
1  4.830845   1.197018  -0.625695
1  5.105750   -0.242835  -1.589887
6  2.947988   1.981621  1.198216
1  2.662274   2.671548  2.006967
1  4.048746   1.965103  1.194598
1  -2.055939   -3.636897  -1.307687
1  -1.126626   -3.094476  -0.044896
1  -2.741753   -3.350843  0.157953
7  -2.038947   -3.013670  -0.499627
7  -0.010712   -0.688926  -1.655242
1  -0.058543   -1.668104  -1.938537
1  0.013723   -0.128049  -2.508499
54
Structure FIr electronic energy -1060.19075781
77  1.785454   -0.361190  -0.283550
77  -1.648521   -0.275581  -0.184812
6  2.449774   1.582997  -0.911844
6  1.570385   1.705324  0.191942
6  1.977189   1.963102  1.628784
1  2.215122   3.033386  1.779986
1  1.092567   1.752688  2.251022
6  3.123475   -0.288604  1.399872
6  3.838765   -0.572123  0.204215
6  4.689483   0.422555  -0.563910
1  4.930767   -0.038110  -1.535256
1  5.657022   0.591130  -0.053732
6  -2.693988   0.962110  -1.522014
6  -1.952503   1.788637  -0.624514
6  -2.566557   1.763470  1.838879
1  -1.618571   1.950542  2.368892
1  -3.371689   2.101841  2.518849
6  -2.655763   0.266986  1.602532
6  -3.588810   -0.372972  0.745043
6  -4.191781   0.724504  -1.457365
1  -4.420126   -0.118376  -2.129839
1  -4.745028   1.596541  -1.855961
1  -3.825936   -1.417875  0.966709
1  2.027088   1.798092  -1.900907
1  0.541676   1.999800  -0.023133
1  4.149063   -1.614983  0.051275
1  -2.288194   0.863113  -2.538926
1  -1.052758   2.251139  -1.047274
1  -2.244870   -0.333629  2.423439
1  2.915941   -1.136621  2.064929
8  -1.018580   -2.110243  0.516707
6  -1.691581   -2.934618  1.413609
1  -1.037703   -3.778613  1.715631
1  -1.989595   -2.418412  2.348771
1  -2.611316   -3.380486  0.982402
6  3.962722   1.760499  -0.808517
1  4.339580   2.216986  -1.736341
1  4.195290   2.478031  -0.006788
6  3.144800   1.070574  2.092044
1  4.109338   1.568886  1.908694
1  3.085318   0.927775  3.181748
6  -4.666118   0.376269  -0.033747
1  -4.959432   1.287189  0.510127
1  -5.574158   -0.243537  -0.089146
6  -2.576160   2.574625  0.527298
1  -2.016380   3.511053  0.675174
1  -3.601465   2.880135  0.266298
1  1.575104   -2.983183  -0.976848
7  1.470977   -2.468887  -0.100698
1  2.050426   -2.939074  0.596462
1  0.433941   -2.489340  0.193277
7  0.044109   -0.375120  -1.485771
1  -0.027548   -1.235801  -2.033994
1  0.025743   0.381022  -2.173883
54
Structure TSF/GIr electronic energy -1060.15900978
77  -1.495524   -0.376456  -0.002050
77  1.504033   -0.244996  -0.108861
6  -3.209261   -0.266178  1.283236
6  -2.343275   0.835170  1.517321
6  -2.580831   2.245071  1.009351
1  -3.357114   2.753344  1.612524
1  -1.650592   2.810853  1.173612
6  -2.942124   2.295633  -0.491443
1  -4.035441   2.298340  -0.623565
1  -2.589000   3.248010  -0.915527
6  -2.331233   1.138966  -1.278735
6  -2.987128   -0.101439  -1.493134
6  -4.362516   -0.471419  -0.969596
1  -4.488045   -1.555748  -1.120221
1  -5.155795   0.016694  -1.567832
6  -4.530651   -0.148519  0.528232
1  -4.947011   0.862050  0.660454
1  -5.268695   -0.834941  0.970997
6  3.323309   0.083572  0.986112
6  2.309744   0.900914  1.537618
6  2.231888   2.406510  1.299123
1  3.249090   2.807600  1.167042
1  1.831057   2.896973  2.199264
6  1.352043   2.758265  0.082756
1  0.317223   2.921841  0.419678
1  1.681158   3.707955  -0.380180
6  1.305797   1.638571  -0.939784
6  2.471439   0.976018  -1.488942
6  3.898638   1.385934  -1.119509
1  4.558762   1.250432  -1.989738
1  3.924517   2.463361  -0.889969
6  4.431942   0.562334  0.067239
1  4.941460   -0.335004  -0.317924
1  5.194753   1.130860  0.632689
1  2.366396   0.587626  -2.510759
1  -3.163525   -1.087753  2.008050
1  -1.714555   0.793244  2.416748
1  -2.698036   -0.656516  -2.395293
1  3.542994   -0.850576  1.511945
1  1.829150   0.541077  2.454607
1  0.437311   1.712832  -1.603980
1  -1.595990   1.438931  -2.034571
8  1.984795   -2.485197  0.659997
6  1.798700   -3.628722  -0.138366
1  1.911641   -4.555184  0.454514
1  0.800696   -3.657326  -0.617311
1  2.556915   -3.634897  -0.936359
7  -0.293180   -1.437141  1.403613
1  -0.415270   -1.083844  2.355612
1  -0.746931   -2.358802  1.409711
1  1.134537   -2.249623  1.158588
7  0.007447   -0.962719  -1.393655
1  0.063413   -1.971970  -1.539138
1  -0.067387   -0.541552  -2.322054
54
Structure GIr electronic energy-1060.18652925
77  1.524596   0.474709  -0.032903
77  -1.293955   0.042949  -0.077077
6  3.127463   0.372378  1.403061
6  2.252181   -0.737231  1.545770
6  2.514984   -2.139409  1.028306
1  3.205061   -2.685431  1.699414
1  1.554978   -2.679232  1.066395
6  2.494740   -0.993266  -1.246790
6  3.156131   0.256281  -1.388193
6  4.475318   0.627555  -0.736794
1  4.602534   1.715352  -0.856793
1  5.325111   0.157934  -1.268507
6  -2.881207   -0.238523  1.322756
6  -1.949491   -1.302139  1.456384
6  -1.674451   -1.624642  -1.333060
6  -2.782959   -0.742056  -1.424737
6  -4.227208   -0.337478  0.628897
1  -4.610210   0.688818  0.508525
1  -4.961555   -0.864030  1.267994
1  -2.825647   -0.107715  -2.317527
1  3.005481   1.184470  2.129323
1  1.544115   -0.707154  2.384207
1  2.937740   0.822511  -2.302673
1  -2.831848   0.551276  2.082969
1  -1.248953   -1.241836  2.297987
1  -0.964135   -1.617886  -2.169871
1  1.813595   -1.285496  -2.055205
6  3.041768   -2.156422  -0.422456
1  4.142118   -2.135742  -0.433719
1  2.755354   -3.105773  -0.900250
6  4.511567   0.280270  0.765052
1  5.198305   0.967126  1.283034
1  4.927514   -0.727223  0.919060
6  -4.131191   -1.004402  -0.757544
1  -4.302297   -2.088639  -0.677284
1  -4.936413   -0.622705  -1.403478
6  -1.626842   -2.896418  -0.506457
1  -0.568055   -3.194511  -0.438337
1  -2.148480   -3.723502  -1.024763
6  -2.187742   -2.711559  0.920160
1  -1.710637   -3.440503  1.592731
1  -3.263616   -2.942465  0.944180
7  0.036184   0.953953  -1.455262
1  -0.159050   1.956870  -1.524018
1  0.103550   0.593470  -2.408093
6  -2.960733   3.497100  0.619069
1  -4.007670   3.162948  0.760364
1  -2.392477   3.198001  1.523109
1  -2.964748   4.597537  0.575335
8  -2.389257   3.014020  -0.570852
1  -2.360677   2.032735  -0.521109
7  -0.057736   1.236945  1.156628
1  -0.209850   2.233781  0.984092
1  -0.057499   1.098669  2.168090
54
Structure HIr electronic energy--944.529629854
77  1.426949   -0.476218  -0.017739
77  -1.426950   -0.476217  0.017737
7  -0.021487   -1.331246  -1.317761
6  3.007352   -0.004261  -1.400653
6  1.987873   0.984972  -1.443821
6  2.054300   2.346889  -0.777521
1  2.669890   3.048505  -1.372229
1  1.030540   2.754726  -0.780991
6  2.561807   2.279841  0.678924
1  3.654112   2.411389  0.713336
1  2.140979   3.123050  1.247763
6  2.177071   0.969773  1.363078
6  3.005538   -0.185657  1.383110
6  4.368323   -0.296876  0.724819
1  4.647283   -1.362771  0.732448
1  5.140203   0.227702  1.320376
6  4.362749   0.210273  -0.730880
1  4.634024   1.276467  -0.769933
1  5.141184   -0.315119  -1.305227
6  -3.005536   -0.185645  -1.383111
6  -2.177067   0.969784  -1.363072
6  -2.561797   2.279851  -0.678913
1  -3.654101   2.411406  -0.713330
1  -2.140961   3.123060  -1.247746
6  -2.054297   2.346886  0.777534
1  -1.030536   2.754719  0.781010
1  -2.669886   3.048501  1.372245
6  -1.987876   0.984965  1.443828
6  -3.007355   -0.004269  1.400653
6  -4.362752   0.210263  0.730883
1  -5.141183   -0.315144  1.305223
1  -4.634038   1.276453  0.769950
6  -4.368323   -0.296868  -0.724823
1  -4.647287   -1.362761  -0.732465
1  -5.140201   0.227718  -1.320376
1  -3.003989   -0.741995  2.211563
1  3.003988   -0.741982  -2.211568
1  1.296740   0.949822  -2.296137
1  2.865707   -0.870289  2.229612
1  -2.865706   -0.870273  -2.229618
1  -1.459684   1.077383  -2.185692
1  -1.296744   0.949809  2.296144
1  -0.035727   -1.067535  -2.304266
1  -0.013618   -2.353540  -1.284358
1  1.459691   1.077370  2.185700
7  0.021486   -1.331260  1.317751
1  0.013615   -2.353554  1.284326
1  0.035725   -1.067570  2.304260
56
Structure TSB/C�Ir electronic energy -1119.24244094
77  1.705376   0.151950  0.327986
77  -1.674481   -0.024187  -0.150127
6  2.376759   -0.190421  -1.693865
6  2.705983   1.130326  -1.293582
6  4.093692   1.599349  -0.897084
1  4.733200   1.719606  -1.791748
1  3.987870   2.603008  -0.456179
6  4.756546   0.665033  0.130802
1  5.368515   -0.098194  -0.373464
1  5.452909   1.240617  0.759014
6  3.725991   -0.024104  1.025083
6  3.180142   -1.310817  0.745156
6  3.528188   -2.123073  -0.490631
1  2.840935   -2.980721  -0.527315
1  4.542625   -2.552130  -0.387969
6  3.401842   -1.316037  -1.800697
1  4.378970   -0.902519  -2.095436
1  3.106603   -1.992941  -2.615927
6  -3.098459   1.306323  -0.950698
6  -3.135553   1.394633  0.472610
6  -4.260284   0.793888  1.314589
1  -5.199412   0.793586  0.739900
1  -4.447024   1.436177  2.188901
6  -3.910960   -0.631086  1.784913
1  -3.386412   -0.575042  2.752486
1  -4.827122   -1.225006  1.965685
6  -2.987609   -1.347583  0.815871
6  -3.194812   -1.434947  -0.593598
6  -4.412841   -0.839821  -1.297886
1  -4.695823   -1.482537  -2.145395
1  -5.278615   -0.844929  -0.617598
6  -4.128542   0.588293  -1.804801
1  -3.722056   0.533392  -2.827378
1  -5.064058   1.175416  -1.875529
1  -2.743105   -2.293600  -1.105107
1  1.471517   -0.306481  -2.295950
1  2.043760   1.921080  -1.659353
1  2.862636   -1.910214  1.606361
1  -2.578210   2.114253  -1.482701
1  -2.647096   2.265373  0.924806
1  -2.412571   -2.155393  1.283443
1  3.784329   0.254529  2.082760
1  1.816471   1.255390  1.526149
1  1.499267   0.248104  3.113904
1  0.051482   0.681034  2.379967
7  0.949445   0.214983  2.258769
8  -0.035488   1.276524  -0.272188
8  -0.054019   -1.289221  -0.205476
6  -0.030436   -2.620856  0.207049
1  0.097507   -2.714591  1.304275
1  -0.955449   -3.157590  -0.073224
1  0.805544   -3.158973  -0.277070
6  -0.090508   2.650557  0.004465
1  -0.158507   2.858814  1.090276
1  0.812370   3.158917  -0.377938
1  -0.964884   3.112530  -0.484088
56
Structure C�Ir electronic energy -1119.26966250
77  1.607742   -0.000003  0.004647
77  -1.732354   -0.381641  -0.328778
6  3.021805   -0.919994  1.297629
6  3.147084   -1.444023  -0.021011
6  3.140792   1.200419  -0.847882
6  2.765258   1.698720  0.434564
6  -2.395137   -0.481784  1.822715
6  -1.837692   0.774747  1.595896
6  -3.113755   1.148435  -0.932010
6  -3.855586   -0.007008  -0.604636
1  2.473208   -1.537260  2.020043
1  2.720862   -2.437150  -0.204535
1  2.751159   1.734870  -1.720171
1  2.102470   2.574086  0.446833
1  -1.751587   -1.238972  2.279717
1  -0.785042   0.911206  1.856283
1  -2.961562   1.346619  -1.998891
1  -4.195950   -0.620418  -1.443223
6  -3.881827   -0.779523  1.854356
6  -2.975523   2.371547  -0.044649
1  -2.162466   2.987215  -0.452590
1  -3.891868   2.986675  -0.118038
1  -3.999634   -1.873211  1.815312
1  -4.317564   -0.457312  2.818233
6  4.246777   -1.074575  -0.999386
6  3.575184   1.521945  1.706476
1  5.194125   -1.580586  -0.733324
1  3.953205   -1.470703  -1.984667
1  2.933315   1.830215  2.547339
1  4.447454   2.202690  1.718435
8  0.039864   -1.352227  0.257043
6  0.073105   -2.756313  0.326343
1  -0.022568   -3.210348  -0.675655
1  1.014797   -3.096428  0.787195
1  -0.758475   -3.126110  0.952031
6  4.445516   0.448665  -1.105280
1  4.820226   0.703157  -2.108247
1  5.219964   0.790283  -0.401666
6  4.016952   0.058896  1.917568
1  5.019609   -0.108494  1.495427
1  4.108461   -0.146613  2.994924
8  -0.052310   1.095691  -0.652797
6  0.026493   1.904730  -1.792559
1  0.858493   2.625727  -1.708226
1  0.169926   1.320855  -2.720794
1  -0.895931   2.498419  -1.917153
7  -1.386014   -1.039707  -2.214486
1  -1.860314   -0.495597  -2.938099
1  -0.385782   -0.962103  -2.411882
1  -2.537810   -1.712603  -0.210100
6  -2.658727   2.044934  1.429001
1  -3.587537   1.961021  2.012951
1  -2.103474   2.886770  1.868104
6  -4.668050   -0.149743  0.682662
1  -5.056087   0.839391  0.968574
1  -5.552859   -0.768926  0.472591
4
Structure NH3 electronic energy -56.5106947867
7  0.000000   0.000000  0.122434
1  0.000000   0.937958  -0.285680
1  0.812296   -0.468979  -0.285680
1  -0.812296   -0.468979  -0.285680
6
Structure MeOH electronic energy -115.634995781
6  -0.046589   0.653083  0.000000
1  -1.096128   0.986029  0.000000
1  0.438966   1.090876  0.895990
1  0.438966   1.090876  -0.895990
8  -0.046589   -0.753909  0.000000
1  0.870450   -1.055009  0.000000
60
Structure BIr-NH3 electronic energy -1175.82238227
77  -1.839636   -0.365085  0.000113
77  1.839568   -0.364955  0.000283
6  -2.062342   1.602766  0.817866
6  -1.767495   1.678066  -0.567666
6  -2.789121   1.981220  -1.650759
1  -3.039140   3.059643  -1.656414
1  -2.305259   1.774128  -2.618339
6  -3.725218   -0.236831  -0.871337
6  -3.827387   -0.452095  0.571461
6  -4.267788   0.610586  1.564313
1  -4.104235   0.203733  2.575786
1  -5.352516   0.819444  1.487074
6  3.827440   -0.453102  -0.570625
6  3.725077   -0.236304  0.871911
6  2.789490   1.982867  1.648734
1  2.305354   1.776869  2.616414
1  3.039848   3.061220  1.653413
6  1.767923   1.678962  0.565789
6  2.062913   1.601903  -0.819595
6  4.268103   0.608313  -1.564705
1  4.104237   0.200309  -2.575668
1  5.352921   0.816892  -1.487907
1  1.229369   1.773439  -1.505607
1  -1.228681   1.774888  1.503596
1  -0.738439   1.931250  -0.838669
1  -4.141274   -1.461998  0.879535
1  4.141028   -1.463432  -0.877594
1  3.987472   -1.098420  1.504021
1  0.738980   1.932952  0.836453
1  -3.987985   -1.099533  -1.502506
8  -0.041266   -0.785722  1.282888
8  0.041006   -0.786651  -1.282158
6  0.025455   -0.415747  -2.625706
1  -0.848423   -0.852473  -3.152694
1  -0.040720   0.681065  -2.776846
1  0.941908   -0.752902  -3.151647
6  -0.026324   -0.413307  2.626036
1  0.846865   -0.850106  3.154106
1  0.040638   0.683621  2.775715
1  -0.943391   -0.749107  3.151749
6  -3.443153   1.898935  1.398974
1  -3.325064   2.400608  2.371801
1  -3.969079   2.618177  0.752475
6  -4.053353   1.109809  -1.525112
1  -4.835610   1.633863  -0.951936
1  -4.483056   0.943665  -2.525030
6  3.443928   1.897089  -1.400774
1  3.969961   2.616744  -0.754833
1  3.326199   2.397900  -2.374091
6  4.053477   1.110961  1.524257
1  4.482956   0.945814  2.524439
1  4.835996   1.634130  0.950631
1  -1.466809   -2.943831  0.643511
7  -1.745980   -2.501912  -0.232787
1  -2.545776   -2.995454  -0.629974
1  -0.949082   -2.491636  -0.885724
7  1.745657   -2.501545  0.234533
1  0.948814   -2.490985  0.887501
1  2.545431   -2.995006  0.631873
1  1.466439   -2.943776  -0.641589
56
Structure C��Ir electronic energy -1119.25784214
77  1.677695   -0.012924  0.146702
77  -1.642056   -0.095544  -0.334175
6  3.263441   -1.261149  0.793959
6  3.072865   -1.382527  -0.615732
6  3.065121   1.385876  -0.654402
6  3.013658   1.495682  0.766407
6  -2.518112   -0.700321  1.638895
6  -2.440554   0.693593  1.608064
6  -3.329115   0.844735  -1.019713
6  -3.756802   -0.590404  -0.952847
1  2.850728   -2.064757  1.416120
1  2.547218   -2.278327  -0.968027
1  2.525866   2.148437  -1.228768
1  2.440052   2.337779  1.176809
1  -1.705572   -1.240175  2.132721
1  -1.559201   1.150417  2.065002
1  -3.250805   1.215905  -2.052024
1  -4.040176   -0.996127  -1.936259
6  -3.796194   -1.498742  1.430081
6  -3.910544   1.900162  -0.091997
1  -3.417498   2.849067  -0.357652
1  -4.989116   2.061736  -0.280001
1  -3.504240   -2.553482  1.301566
1  -4.416893   -1.466156  2.344264
6  3.966123   -0.755189  -1.670688
6  4.068821   0.960623  1.718550
1  4.915357   -1.315919  -1.765453
1  3.449183   -0.860581  -2.637944
1  3.652330   1.026551  2.736389
1  4.970606   1.602006  1.712001
8  0.105112   -1.321861  0.313293
6  0.089145   -2.700198  0.080731
1  0.077759   -2.936780  -0.999908
1  0.963850   -3.196636  0.539463
1  -0.818402   -3.145378  0.531864
6  4.231781   0.738150  -1.398463
1  4.395203   1.263659  -2.351610
1  5.160843   0.868622  -0.822439
6  4.436418   -0.506539  1.417790
1  5.311087   -0.558374  0.751033
1  4.740695   -1.008655  2.348682
8  -0.051204   1.172936  0.102737
6  -0.158091   2.505836  -0.323406
1  0.726769   3.077589  0.001724
1  -0.240752   2.577916  -1.423123
1  -1.050796   2.978152  0.123127
7  -0.912073   -0.311988  -2.207570
1  -1.284197   0.374473  -2.868161
1  0.103174   -0.175270  -2.203533
6  -3.650670   1.595075  1.399287
1  -4.537212   1.129934  1.858116
1  -3.494709   2.537133  1.946056
6  -4.639932   -1.078758  0.206374
1  -5.360566   -0.289665  0.464081
1  -5.238905   -1.939313  -0.127540
1  -2.756812   -1.321828  -0.863707
52
Structure ARh, electronic energy: -1075.15293209
45  -1.487740   -0.010059  -0.340819
45  1.487726   0.010140  -0.340872
6  -3.092551   -1.400496  -0.246124
6  -2.357834   -1.413583  0.959750
6  -2.780271   -0.752375  2.257056
1  -3.548641   -1.357417  2.775775
1  -1.899966   -0.742653  2.919141
6  -3.268671   0.693809  2.048290
1  -4.356726   0.716456  1.885146
1  -3.090863   1.278259  2.963959
6  -2.556872   1.360389  0.876508
6  -3.063443   1.382926  -0.441456
6  -4.340218   0.708553  -0.903950
1  -4.326724   0.705795  -2.005343
1  -5.227561   1.301347  -0.609281
6  -4.459468   -0.742874  -0.398850
1  -4.998405   -0.776691  0.560146
1  -5.068455   -1.327723  -1.104870
6  3.063422   -1.382824  -0.441896
6  2.556904   -1.360594  0.876094
6  3.268748   -0.694288  2.048005
1  4.356797   -0.716905  1.884820
1  3.090967   -1.278948  2.963546
6  2.780365   0.751851  2.257123
1  1.900085   0.741980  2.919239
1  3.548758   1.356769  2.775953
6  2.357879   1.413362  0.959986
6  3.092546   1.400551  -0.245921
6  4.459455   0.742961  -0.398859
1  5.068413   1.327972  -1.104770
1  4.998434   0.776555  0.560121
6  4.340179   -0.708348  -0.904289
1  4.326638   -0.705335  -2.005681
1  5.227533   -1.301212  -0.609796
1  2.869832   2.189147  -0.972820
1  -2.869867   -2.188925  -0.973213
1  -1.630191   -2.222161  1.089453
1  -2.731091   2.201737  -1.088959
1  2.731041   -2.201485  -1.089575
1  1.848635   -2.150307  1.148823
1  1.630249   2.221916  1.089908
1  -1.848593   2.150038  1.149394
8  -0.007467   1.284025  -1.028143
8  0.007427   -1.283784  -1.028442
6  0.018687   -2.676908  -0.988631
1  -0.940763   -3.087668  -1.352013
1  0.811089   -3.079251  -1.646535
1  0.190990   -3.087821  0.026784
6  -0.018725   2.677140  -0.988003
1  -0.811153   3.079637  -1.645783
1  -0.190992   3.087814  0.027515
1  0.940711   3.087986  -1.351323
56
Structure TSA/BRh electronic energy: -1131.67656224
45  1.471752   -0.399213  0.042278
45  -1.436320   -0.399119  0.065149
6  1.791293   1.415239  1.037539
6  2.754594   0.439393  1.439145
6  4.198976   0.400798  0.974809
1  4.807277   1.170066  1.488966
1  4.612573   -0.572594  1.283168
6  3.096988   -0.008278  -1.277709
6  1.981289   0.783574  -1.627098
6  1.803625   2.260462  -1.333407
1  0.748615   2.504367  -1.536387
1  2.404601   2.875530  -2.031294
6  -3.038944   -0.459249  -1.296282
6  -2.361576   0.774555  -1.431051
6  -2.348524   2.411972  0.499509
1  -1.380739   2.930163  0.402366
1  -3.018025   3.108573  1.040090
6  -2.100450   1.155575  1.310585
6  -2.988540   0.063916  1.439515
6  -4.355479   -0.660850  -0.571329
1  -4.492666   -1.745898  -0.439632
1  -5.205218   -0.317273  -1.192632
1  -2.850328   -0.584768  2.311482
1  0.948509   1.581103  1.715699
1  2.593307   -0.040386  2.411599
1  1.378584   0.428006  -2.466664
1  -2.815101   -1.232475  -2.039352
1  -1.639936   0.856098  -2.250691
1  -1.356300   1.281780  2.103877
1  3.258717   -0.916180  -1.868553
8  -0.102251   -1.426261  -1.156427
6  -0.161545   -1.556429  -2.538964
1  -0.937055   -2.287981  -2.840660
1  -0.388895   -0.610645  -3.072129
1  0.804979   -1.923778  -2.939836
6  2.119929   2.597640  0.130766
1  1.537352   3.477314  0.445633
1  3.177573   2.880179  0.249178
6  4.325420   0.535927  -0.555577
1  4.482842   1.588376  -0.839217
1  5.220523   -0.003173  -0.901792
6  -4.377320   0.020194  0.810979
1  -4.783710   1.040213  0.734291
1  -5.062812   -0.524613  1.478074
6  -2.895182   2.103016  -0.906830
1  -2.609273   2.909992  -1.598950
1  -3.995552   2.088922  -0.901196
1  1.738080   -3.187495  1.085323
1  1.009938   -2.938759  -0.365909
1  2.589545   -3.479720  -0.301331
7  1.901861   -2.864694  0.132616
8  0.015874   -1.083746  1.415266
6  0.035724   -0.898140  2.794224
1  0.198088   0.153885  3.104666
1  -0.916967   -1.227845  3.249201
1  0.843370   -1.499034  3.256403
56
Structure BRh electronic energy: -1131.68157623
45  -1.719410   -0.138903  -0.500368
45  1.593825   -0.074347  -0.251267
6  -1.807967   -0.200893  1.655027
6  -1.676817   1.124705  1.224042
6  -2.798690   2.140870  1.141449
1  -3.036476   2.538806  2.147045
1  -2.421243   2.994856  0.557432
6  -3.683498   0.525940  -0.597230
6  -3.625890   -0.886787  -0.302682
6  -3.894469   -1.506729  1.057153
1  -3.576404   -2.560765  1.003983
1  -4.977188   -1.525260  1.290161
6  3.151520   -1.472012  -0.037135
6  2.699030   -1.099056  1.247073
6  2.999418   1.302444  2.004321
1  2.146370   1.487317  2.677068
1  3.794419   2.006526  2.317898
6  2.532242   1.607354  0.594047
6  3.217364   1.258880  -0.590431
6  4.417993   -0.972602  -0.704786
1  4.364250   -1.263556  -1.766104
1  5.309689   -1.482927  -0.291874
1  2.973439   1.832685  -1.491250
1  -0.884333   -0.711945  1.941265
1  -0.665440   1.543233  1.233432
1  -3.875628   -1.563293  -1.133140
1  2.779501   -2.421778  -0.438454
1  2.007246   -1.784266  1.747533
1  1.830655   2.446161  0.531874
1  -3.971046   0.795164  -1.622601
8  0.104331   -1.483209  -0.482248
8  0.124258   1.005765  -1.230971
6  0.069364   2.383221  -1.406692
1  -0.754020   2.654761  -2.098849
1  -0.118504   2.939089  -0.463964
1  1.005178   2.791213  -1.839071
6  0.016970   -2.716175  0.152836
1  0.929305   -3.330391  0.011930
1  -0.151461   -2.638308  1.247836
1  -0.831610   -3.303646  -0.253830
6  -3.105762   -0.801900  2.176830
1  -2.875292   -1.517860  2.980754
1  -3.715298   -0.012381  2.642077
6  -4.054103   1.578005  0.449487
1  -4.747890   1.147544  1.189529
1  -4.606272   2.401495  -0.029132
6  4.571196   0.558483  -0.610463
1  5.147571   0.834670  0.285731
1  5.159170   0.921991  -1.467289
6  3.463110   -0.157596  2.171638
1  3.316486   -0.472042  3.216431
1  4.544005   -0.244362  1.982631
1  -1.125321   -1.610009  -2.542363
7  -1.561702   -0.686118  -2.541221
1  -2.339464   -0.654923  -3.199841
1  -0.825935   -0.016095  -2.795858
56
Structure TSB/CRh electronic energy: -1131.68002126
45  1.734915   0.116446  -0.539857
45  -1.568815   0.159017  -0.281713
6  1.521809   -0.642541  1.448792
6  1.926202   -1.675500  0.585747
6  3.331471   -2.230402  0.467856
1  3.561211   -2.905283  1.315099
1  3.360533   -2.856209  -0.438176
6  3.829204   0.114646  -0.357391
6  3.272208   1.224610  0.335320
6  3.084439   1.323350  1.836922
1  2.417571   2.179594  2.023291
1  4.038295   1.560761  2.346415
6  -3.226422   1.339927  0.246585
6  -2.650113   0.812421  1.422940
6  -2.661405   -1.694323  1.801539
1  -1.744721   -1.886451  2.382554
1  -3.356871   -2.520058  2.047450
6  -2.279243   -1.726448  0.334466
6  -3.084384   -1.268623  -0.730870
6  -4.485692   0.822948  -0.420872
1  -4.532336   1.273793  -1.425090
1  -5.388835   1.174089  0.115014
1  -2.862377   -1.669474  -1.725415
1  0.449150   -0.565824  1.658450
1  1.138794   -2.343905  0.226162
1  3.338413   2.202007  -0.161301
1  -2.972575   2.374435  -0.010719
1  -1.986115   1.474053  1.987680
1  -1.509276   -2.466969  0.091927
1  4.262785   0.316329  -1.344247
8  -0.284906   1.764202  -0.391238
8  -0.050215   -0.654380  -1.457557
6  -0.062719   -1.869318  -2.136458
1  0.796968   -1.937210  -2.831796
1  -0.003012   -2.755909  -1.470782
1  -0.982984   -1.983167  -2.740886
6  -0.212363   2.801587  0.525785
1  -1.146755   3.399321  0.593374
1  0.022542   2.457396  1.555792
1  0.593874   3.512608  0.245024
6  2.447294   0.053937  2.437656
1  1.877046   0.321464  3.340303
1  3.226502   -0.648432  2.771516
6  4.389944   -1.119383  0.346058
1  4.772501   -0.836668  1.338979
1  5.259515   -1.497702  -0.213115
6  -4.493354   -0.712654  -0.557914
1  -4.975026   -1.177150  0.315929
1  -5.108061   -1.000224  -1.424779
6  -3.251227   -0.335687  2.226523
1  -3.058747   -0.170516  3.297866
1  -4.346192   -0.337432  2.116927
1  1.293004   0.894882  -3.062738
1  0.783340   1.894993  -1.832302
1  2.342873   2.066509  -2.509138
7  1.610218   1.410092  -2.242054
56
Structure CRh electronic energy: -1131.67886226
45  1.645700   -0.436010  -0.109898
45  -1.698542   -0.369161  0.039248
6  3.435272   -0.207485  -1.251238
6  2.520001   0.829423  -1.537826
6  2.594450   2.249725  -1.014735
1  3.343202   2.835895  -1.581294
1  1.620844   2.722873  -1.217841
6  2.878595   2.319839  0.499208
1  3.961400   2.377109  0.687331
1  2.453887   3.250318  0.905402
6  2.287441   1.132031  1.245511
6  2.977944   -0.060256  1.508870
6  4.397848   -0.377779  1.086237
1  4.550084   -1.458761  1.233092
1  5.120099   0.127086  1.756184
6  4.676332   -0.024561  -0.386271
1  5.043728   1.009085  -0.474065
1  5.487135   -0.663275  -0.768369
6  -3.721853   -0.192807  -0.503862
6  -2.931338   0.477528  -1.459337
6  -2.798935   1.991978  -1.553004
1  -3.720063   2.473143  -1.191118
1  -2.702934   2.286416  -2.609644
6  -1.576656   2.506051  -0.765487
1  -0.686900   2.457713  -1.414326
1  -1.704011   3.573334  -0.499372
6  -1.273425   1.673447  0.463868
6  -2.214565   1.212877  1.399550
6  -3.701681   1.546084  1.354300
1  -4.083533   1.643328  2.382348
1  -3.847352   2.532182  0.887949
6  -4.512760   0.468788  0.605975
1  -4.804070   -0.321504  1.316399
1  -5.458648   0.892751  0.216781
1  -1.832785   0.923209  2.383644
1  3.490090   -1.032457  -1.970768
1  1.934982   0.735674  -2.462022
1  2.616446   -0.665582  2.346096
1  -4.041349   -1.207610  -0.762841
1  -2.689541   -0.084772  -2.367580
1  -0.230859   1.717374  0.786214
1  1.438652   1.357946  1.896546
8  0.051100   -1.096262  1.055829
8  -1.682233   -2.140304  -0.998492
6  -1.817068   -3.293019  -0.224888
1  -1.660953   -4.198611  -0.849356
1  -1.089741   -3.340217  0.612441
1  -2.832618   -3.388530  0.215855
6  0.039608   -1.093413  2.453087
1  0.829850   -1.753283  2.859092
1  0.188561   -0.088014  2.898111
1  -0.925407   -1.477626  2.830473
7  0.853972   -1.729464  -1.611434
1  0.933289   -1.390013  -2.571568
1  1.371900   -2.609345  -1.570970
1  -0.179499   -1.955071  -1.421952
56
Structure TSC/DRh electronic energy: -1131.65941614
45  -1.492136   0.380027  -0.135942
45  1.536136   0.308367  -0.015863
6  -3.141248   0.084938  -1.434938
6  -2.310928   -1.059504  -1.414947
6  -2.612086   -2.346161  -0.672934
1  -3.367138   -2.943695  -1.219196
1  -1.691462   -2.949925  -0.675027
6  -3.056144   -2.114153  0.786372
1  -4.153115   -2.046474  0.847565
1  -2.776549   -2.988212  1.394272
6  -2.431654   -0.863084  1.387852
6  -3.028602   0.404313  1.349452
6  -4.354256   0.742402  0.696319
1  -4.420905   1.840577  0.641725
1  -5.198062   0.415852  1.334378
6  -4.487793   0.160420  -0.724286
1  -4.947203   -0.839459  -0.690084
1  -5.177760   0.785826  -1.311290
6  3.417420   -0.065479  -0.950366
6  2.456235   -0.930065  -1.498886
6  2.361501   -2.415066  -1.171714
1  3.362040   -2.801611  -0.924687
1  2.040402   -2.965650  -2.069184
6  1.376053   -2.682323  -0.018121
1  0.369584   -2.838939  -0.434470
1  1.637558   -3.616018  0.515962
6  1.280067   -1.511927  0.940574
6  2.396600   -0.825995  1.511545
6  3.846986   -1.232597  1.261925
1  4.440023   -1.054848  2.171991
1  3.902422   -2.316511  1.075528
6  4.453822   -0.444712  0.087824
1  4.888024   0.492564  0.469976
1  5.288934   -1.002189  -0.378524
1  2.223689   -0.316595  2.465512
1  -3.023371   0.766001  -2.284891
1  -1.620729   -1.188043  -2.258183
1  -2.705175   1.128305  2.105121
1  3.635752   0.850283  -1.505880
1  1.994695   -0.618099  -2.442553
1  0.345870   -1.488684  1.509660
1  -1.682039   -1.035459  2.165823
8  0.024025   1.213877  1.093254
8  1.901453   2.404033  -0.998616
6  1.637540   3.554709  -0.221867
1  1.465613   4.438202  -0.865156
1  0.764609   3.406394  0.435200
1  2.516718   3.761696  0.408566
6  0.009742   1.241342  2.488766
1  -0.858944   1.816689  2.858252
1  -0.043224   0.235510  2.951658
1  0.918657   1.737525  2.876773
7  -0.316645   1.198977  -1.669561
1  -0.397632   0.692685  -2.554899
1  -0.819450   2.079163  -1.835987
1  1.041327   2.066937  -1.432335
56
Structure DRh electronic energy: -1131.68559583
45  1.553139   0.426296  -0.164216
45  -1.262518   0.009197  -0.139418
6  3.193103   0.591156  1.234543
6  2.430094   -0.552427  1.517041
6  2.778215   -1.973626  1.121868
1  3.523454   -2.405188  1.817519
1  1.862985   -2.575303  1.241845
6  2.587080   -1.065582  -1.243084
6  3.124125   0.206538  -1.547753
6  4.410861   0.778451  -0.986601
1  4.407663   1.859434  -1.199664
1  5.290101   0.364804  -1.517631
6  -2.879921   -0.050632  1.272078
6  -2.043615   -1.147975  1.517925
6  -1.705589   -1.735675  -1.216308
6  -2.745409   -0.806056  -1.438625
6  -4.201193   -0.094700  0.529357
1  -4.480328   0.943710  0.296607
1  -5.000846   -0.494124  1.181861
1  -2.709206   -0.247427  -2.380226
1  2.985596   1.485214  1.833141
1  1.702347   -0.479165  2.332054
1  2.808260   0.662542  -2.493554
1  -2.751080   0.826425  1.916324
1  -1.299345   -1.044709  2.314253
1  -0.953989   -1.833388  -2.009247
1  1.880942   -1.487902  -1.967476
8  -0.013751   1.316704  0.916384
6  -0.053993   1.590437  2.284046
1  0.861783   2.120106  2.604598
1  -0.912816   2.245785  2.521697
1  -0.147437   0.681762  2.911170
6  3.264077   -2.088302  -0.336522
1  4.356689   -1.970144  -0.391478
1  3.053888   -3.101955  -0.710861
6  4.545939   0.567918  0.535150
1  5.187108   1.356951  0.957134
1  5.060087   -0.380780  0.749949
6  -4.122804   -0.893129  -0.788130
1  -4.384506   -1.948878  -0.619512
1  -4.876372   -0.504803  -1.489309
6  -1.754239   -2.922173  -0.274893
1  -0.716503   -3.263164  -0.129630
1  -2.294587   -3.769586  -0.739220
6  -2.364354   -2.575138  1.097751
1  -1.976794   -3.273110  1.855577
1  -3.454399   -2.721717  1.083684
7  0.061314   0.705493  -1.578567
1  -0.108758   1.703108  -1.727971
1  0.104134   0.261692  -2.496836
6  -2.514192   3.476183  0.044079
1  -3.118625   3.211430  0.935705
1  -1.449097   3.444737  0.335807
1  -2.770062   4.510908  -0.232824
8  -2.790057   2.646092  -1.060478
1  -2.446079   1.753099  -0.848776
50
Structure ERh electronic energy: -1016.02745969
45  1.425274   -0.319603  -0.389318
45  -1.425274   -0.319603  -0.389318
7  0.000000   -0.092354  -1.885394
6  2.323298   -0.169006  1.566598
6  3.029716   -1.097839  0.786257
6  2.983185   0.851279  -1.232769
6  2.059398   1.668994  -0.541283
6  -3.029717   -1.097839  0.786255
6  -2.323299   -0.169008  1.566598
6  -2.059397   1.668994  -0.541281
6  -2.983184   0.851280  -1.232768
1  1.578590   -0.563710  2.265301
1  2.801032   -2.157573  0.947275
1  2.880742   0.807323  -2.322689
1  1.325905   2.210634  -1.151145
1  -2.801033   -2.157574  0.947272
1  -1.578591   -0.563712  2.265301
1  -1.325903   2.210635  -1.151142
1  -2.880740   0.807326  -2.322689
1  0.000000   -0.931472  -2.469825
1  0.000000   0.719033  -2.504362
6  -4.349952   -0.841472  0.086086
6  -2.256118   2.263003  0.839311
1  -1.269537   2.612083  1.184239
1  -2.901653   3.161514  0.794177
1  -4.511976   -1.672210  -0.618838
1  -5.191564   -0.881185  0.804467
6  4.349952   -0.841472  0.086088
6  2.256118   2.263003  0.839309
1  5.191564   -0.881186  0.804469
1  4.511975   -1.672211  -0.618835
1  1.269536   2.612084  1.184237
1  2.901653   3.161515  0.794174
8  0.000000   -1.810755  0.020439
6  0.000000   -2.673379  1.116779
1  0.889276   -3.330608  1.097869
1  0.000003   -2.145674  2.091738
1  -0.889279   -3.330604  1.097872
6  -4.363672   0.487917  -0.694962
1  -4.741678   1.304531  -0.060873
1  -5.072761   0.409954  -1.533364
6  -2.810419   1.244622  1.855642
1  -2.500506   1.536576  2.870849
1  -3.910549   1.265274  1.860785
6  4.363673   0.487916  -0.694961
1  5.072761   0.409952  -1.533362
1  4.741678   1.304530  -0.060873
6  2.810418   1.244624  1.855641
1  3.910549   1.265275  1.860784
1  2.500506   1.536579  2.870848
54
Structure TSE/FRh electronic energy: -1072.54939677 
45  -1.427029   -0.360175  -0.227921
45  1.422163   -0.427161  -0.259059
6  -1.776663   1.581435  -0.937915
6  -2.766520   0.684391  -1.430942
6  -4.185773   0.567780  -0.909203
1  -4.822105   1.387838  -1.295823
1  -4.605039   -0.365085  -1.318306
6  -3.013441   -0.150247  1.227883
6  -1.869926   0.551446  1.645695
6  -1.653517   2.048439  1.545699
1  -0.581981   2.230831  1.724238
1  -2.197410   2.579326  2.351117
6  3.032412   -0.707564  1.110219
6  2.328307   0.451742  1.480295
6  2.260235   2.426639  -0.113943
1  1.275074   2.882950  0.074068
1  2.907029   3.238726  -0.499293
6  2.056880   1.349470  -1.160610
6  2.976663   0.325428  -1.490306
6  4.352251   -0.737251  0.364422
1  4.513600   -1.773760  0.028084
1  5.195436   -0.500339  1.042240
1  2.870312   -0.128941  -2.481583
1  -0.971119   1.849482  -1.630006
1  -2.648861   0.345559  -2.467872
1  -1.237179   0.062104  2.391400
1  2.810668   -1.622494  1.670830
1  1.590258   0.354510  2.283172
1  1.328026   1.623629  -1.933234
1  -3.168071   -1.142758  1.664011
8  0.063259   -1.714727  0.694815
6  0.110302   -2.110274  2.028828
1  0.853336   -2.917920  2.179799
1  0.377556   -1.293262  2.728335
1  -0.872794   -2.503603  2.358811
6  -2.029374   2.607398  0.163192
1  -1.439054   3.514564  -0.039554
1  -3.083154   2.925763  0.143996
6  -4.249450   0.509788  0.630730
1  -4.369215   1.520934  1.049740
1  -5.146735   -0.048445  0.939721
6  4.361300   0.194654  -0.862960
1  4.739769   1.191403  -0.588473
1  5.067090   -0.195199  -1.612657
6  2.815527   1.869979  1.211988
1  2.505584   2.524120  2.041656
1  3.915810   1.891949  1.208573
1  -2.160354   -3.355204  -1.522917
1  -1.227023   -3.016610  -0.195206
1  -2.818798   -3.436934  -0.021499
7  -2.162225   -2.915188  -0.602367
7  -0.026124   -0.739380  -1.730453
1  -0.055709   -1.713048  -2.035859
1  -0.008895   -0.159711  -2.570612
54
Structure FRh electronic energy -1072.55836856
45  -1.786068   0.434959  -0.391332
45  1.605726   0.339328  -0.248005
6  -2.390171   -1.576986  -0.871447
6  -1.519863   -1.587978  0.229425
6  -1.910446   -1.713884  1.686160
1  -2.089168   -2.773933  1.951755
1  -1.038413   -1.391979  2.277663
6  -3.150794   0.459535  1.280219
6  -3.850422   0.639181  0.073372
6  -4.648336   -0.422683  -0.656613
1  -4.850833   -0.039159  -1.669454
1  -5.637628   -0.568174  -0.180891
6  2.714344   -0.861819  -1.562410
6  1.966156   -1.710526  -0.713179
6  2.462754   -1.694981  1.778966
1  1.488668   -1.894405  2.253904
1  3.229372   -2.042880  2.498244
6  2.562572   -0.196259  1.572428
6  3.511744   0.457729  0.770759
6  4.196177   -0.567080  -1.439241
1  4.411489   0.309586  -2.071465
1  4.796210   -1.400151  -1.854879
1  3.687465   1.518048  0.969129
1  -1.953525   -1.812453  -1.848507
1  -0.473029   -1.825232  0.035647
1  -4.142309   1.664651  -0.185035
1  2.324605   -0.718208  -2.578599
1  1.066368   -2.153420  -1.154412
1  2.066498   0.399825  2.346627
1  -2.919397   1.358699  1.863160
8  0.948003   2.168766  0.424436
6  1.556618   2.986423  1.363479
1  0.881711   3.824501  1.641712
1  1.807115   2.467455  2.313642
1  2.497880   3.451206  0.998119
6  -3.899077   -1.765015  -0.770494
1  -4.258080   -2.307873  -1.658309
1  -4.133619   -2.410786  0.089170
6  -3.122842   -0.843354  2.067081
1  -4.060992   -1.396712  1.909094
1  -3.085715   -0.619218  3.144245
6  4.618633   -0.257542  0.009040
1  4.901566   -1.181953  0.534646
1  5.522660   0.370847  0.001535
6  2.548656   -2.490822  0.460576
1  2.001526   -3.439576  0.574267
1  3.590796   -2.773521  0.245625
1  -1.543420   2.997428  -1.263282
7  -1.499365   2.539823  -0.352013
1  -2.096364   3.070943  0.282746
1  -0.478383   2.549922  -0.006387
7  -0.051205   0.399521  -1.561719
1  0.027805   1.247613  -2.127507
1  -0.029714   -0.373196  -2.230117
54
Structure TSF/GRh electronic energy: -1072.53243596
45  1.469922   0.444816  -0.011939
45  -1.487134   0.311589  -0.133368
6  3.168233   0.349263  1.306114
6  2.328251   -0.757704  1.515990
6  2.575765   -2.156202  0.987886
1  3.334989   -2.677399  1.602482
1  1.642209   -2.725061  1.117636
6  2.977619   -2.185562  -0.502516
1  4.073439   -2.159058  -0.604672
1  2.661218   -3.144342  -0.941358
6  2.360572   -1.042903  -1.299170
6  2.975140   0.204117  -1.499798
6  4.315671   0.636725  -0.940873
1  4.381255   1.730387  -1.058281
1  5.145052   0.214202  -1.540966
6  4.488096   0.281913  0.549165
1  4.928976   -0.720654  0.657297
1  5.209303   0.976011  1.007840
6  -3.308429   -0.010826  0.995559
6  -2.315972   -0.839062  1.524485
6  -2.238925   -2.337505  1.266762
1  -3.254343   -2.732637  1.109670
1  -1.856512   -2.842383  2.167309
6  -1.338044   -2.675279  0.063280
1  -0.303855   -2.808609  0.414785
1  -1.635923   -3.640316  -0.390749
6  -1.309656   -1.570755  -0.973668
6  -2.460467   -0.909493  -1.511132
6  -3.891571   -1.283555  -1.130268
1  -4.552327   -1.144057  -1.999607
1  -3.939409   -2.357465  -0.888659
6  -4.410306   -0.438187  0.047713
1  -4.869937   0.481359  -0.347321
1  -5.212490   -0.971962  0.593134
1  -2.351066   -0.484656  -2.516521
1  3.068853   1.187383  2.004223
1  1.650005   -0.718779  2.376860
1  2.651478   0.779384  -2.375422
1  -3.476649   0.947508  1.493059
1  -1.776716   -0.471852  2.404398
1  -0.430232   -1.618740  -1.623724
1  1.603155   -1.342092  -2.031431
8  -1.972043   2.549596  0.616150
6  -1.747558   3.691241  -0.167735
1  -1.805410   4.619056  0.433476
1  -0.756165   3.683396  -0.663466
1  -2.514669   3.751404  -0.956535
7  0.283099   1.514007  1.378376
1  0.393133   1.160579  2.331824
1  0.781446   2.412082  1.383291
1  -1.106519   2.264571  1.090823
7  -0.013551   0.999737  -1.400353
1  -0.092411   2.006970  -1.549233
1  0.063652   0.577216  -2.327477
54
Structure GRh electronic energy: -1072.55631338
45  1.524387   0.606923  -0.049368
45  -1.224324   0.107684  -0.094541
6  3.121750   0.549010  1.401498
6  2.284727   -0.570922  1.545081
6  2.565865   -1.965207  1.021740
1  3.255396   -2.507600  1.697275
1  1.613625   -2.518810  1.049467
6  2.542436   -0.835960  -1.263199
6  3.155021   0.420629  -1.413943
6  4.441127   0.867676  -0.748885
1  4.501142   1.962544  -0.856844
1  5.322744   0.459784  -1.280747
6  -2.782273   -0.276190  1.328228
6  -1.794954   -1.267855  1.452559
6  -1.513248   -1.578161  -1.357862
6  -2.666527   -0.781980  -1.445574
6  -4.114027   -0.439068  0.622770
1  -4.542970   0.565595  0.488488
1  -4.827379   -0.993899  1.262283
1  -2.739704   -0.114058  -2.310242
1  2.949221   1.383987  2.089250
1  1.544836   -0.541383  2.353607
1  2.887291   0.995015  -2.308509
1  -2.756804   0.538961  2.060618
1  -1.060700   -1.142832  2.255996
1  -0.785948   -1.495869  -2.173988
1  1.835477   -1.140151  -2.043041
6  3.108274   -1.974707  -0.422906
1  4.207521   -1.924265  -0.421080
1  2.854083   -2.935283  -0.897102
6  4.498247   0.509232  0.749540
1  5.167079   1.214330  1.266893
1  4.948211   -0.485116  0.890784
6  -3.985914   -1.112230  -0.758372
1  -4.091019   -2.203945  -0.667139
1  -4.817825   -0.783315  -1.399267
6  -1.352762   -2.827597  -0.515557
1  -0.272236   -3.029789  -0.443278
1  -1.795897   -3.704732  -1.025589
6  -1.930335   -2.684578  0.908585
1  -1.406589   -3.381834  1.580534
1  -2.987617   -2.988828  0.926999
7  0.047860   1.041339  -1.466035
1  -0.160782   2.040176  -1.535703
1  0.115505   0.686602  -2.420653
6  -3.220876   3.288019  0.613838
1  -3.966114   2.731922  1.217386
1  -2.305955   3.391014  1.230841
1  -3.621893   4.299293  0.442336
8  -2.976633   2.695835  -0.635761
1  -2.561212   1.816448  -0.486242
7  -0.055439   1.333875  1.126829
1  -0.217606   2.327317  0.948267
1  -0.059751   1.207593  2.139616
54
Structure HRh electronic energy: -956.899043790
45  1.400374   -0.608438  -0.020252
45  -1.400373   -0.608438  0.020252
7  -0.022855   -1.459427  -1.307736
6  2.968261   -0.117608  -1.418962
6  1.952313   0.853893  -1.453860
6  1.991027   2.206656  -0.771576
1  2.579965   2.931868  -1.366104
1  0.958294   2.589888  -0.758014
6  2.518766   2.142187  0.677181
1  3.610425   2.280482  0.695341
1  2.101494   2.984444  1.250599
6  2.153571   0.834424  1.369771
6  2.972440   -0.309435  1.389789
6  4.319090   -0.449511  0.708817
1  4.567412   -1.522938  0.694193
1  5.115463   0.040195  1.302831
6  4.316693   0.082294  -0.737984
1  4.588515   1.148627  -0.756640
1  5.098262   -0.433627  -1.317100
6  -2.972441   -0.309436  -1.389788
6  -2.153571   0.834424  -1.369771
6  -2.518766   2.142187  -0.677182
1  -3.610426   2.280482  -0.695342
1  -2.101495   2.984443  -1.250600
6  -1.991027   2.206657  0.771575
1  -0.958294   2.589889  0.758013
1  -2.579965   2.931868  1.366104
6  -1.952312   0.853893  1.453860
6  -2.968261   -0.117608  1.418962
6  -4.316693   0.082294  0.737985
1  -5.098261   -0.433627  1.317101
1  -4.588515   1.148627  0.756641
6  -4.319090   -0.449511  -0.708817
1  -4.567412   -1.522939  -0.694191
1  -5.115463   0.040195  -1.302830
1  -2.944194   -0.884189  2.201024
1  2.944195   -0.884190  -2.201024
1  1.230494   0.793491  -2.276921
1  2.807628   -1.018826  2.209302
1  -2.807629   -1.018827  -2.209302
1  -1.404120   0.922568  -2.164105
1  -1.230493   0.793492  2.276920
1  -0.040930   -1.212987  -2.298141
1  -0.017102   -2.480689  -1.256441
1  1.404119   0.922568  2.164105
7  0.022855   -1.459426  1.307736
1  0.017101   -2.480689  1.256442
1  0.040930   -1.212986  2.298141
56
Structure TSB/C�Rh electronic energy: -1131.60790187
45  -1.659214   -0.195839  0.393300
45  1.617331   0.019686  -0.127456
6  -2.319163   0.022649  -1.673719
6  -2.706409   -1.231824  -1.185812
6  -4.100738   -1.612395  -0.729245
1  -4.754846   -1.803727  -1.601374
1  -4.020504   -2.569214  -0.190404
6  -4.732801   -0.564488  0.203832
1  -5.298380   0.180380  -0.375712
1  -5.466579   -1.053892  0.862133
6  -3.696239   0.154068  1.061672
6  -3.088843   1.367777  0.702611
6  -3.333224   2.101648  -0.600920
1  -2.564184   2.880303  -0.691407
1  -4.302008   2.634540  -0.551020
6  -3.272734   1.194946  -1.847425
1  -4.276181   0.821403  -2.103821
1  -2.947161   1.795514  -2.709533
6  2.993020   -1.304019  -1.014054
6  3.123373   -1.410709  0.386372
6  4.281806   -0.807329  1.171585
1  5.182752   -0.771001  0.540320
1  4.535631   -1.466856  2.015847
6  3.932064   0.595620  1.699423
1  3.438106   0.499479  2.679641
1  4.847964   1.192465  1.875509
6  2.976243   1.338110  0.786742
6  3.101520   1.452395  -0.615633
6  4.260736   0.865639  -1.413492
1  4.488821   1.524242  -2.265488
1  5.170950   0.851266  -0.794447
6  3.935949   -0.550101  -1.932120
1  3.440845   -0.468307  -2.912775
1  4.864700   -1.127739  -2.104377
1  2.573782   2.284537  -1.094516
1  -1.376547   0.073473  -2.222988
1  -2.058792   -2.073782  -1.442905
1  -2.683887   1.982328  1.512677
1  2.395346   -2.072155  -1.520089
1  2.626458   -2.256100  0.871824
1  2.387057   2.103893  1.299664
1  -3.735714   -0.075550  2.130483
1  -1.893173   -1.243783  1.543949
1  -1.546595   -0.323261  3.147902
1  -0.129580   -0.809330  2.448074
7  -0.947421   -0.209990  2.330478
8  0.012532   -1.324276  -0.192088
8  0.019600   1.319920  -0.170924
6  0.039587   2.569275  0.435507
1  -0.000002   2.505547  1.542993
1  0.938320   3.158178  0.164443
1  -0.824397   3.181467  0.110809
6  0.090994   -2.669282  0.173119
1  0.210589   -2.814050  1.266663
1  -0.820301   -3.217149  -0.132815
1  0.946296   -3.163344  -0.322155
56
Structure C�Rh electronic energy: -1131.62682277
45  1.573733   -0.011668  0.002580
45  -1.675496   -0.375667  -0.446890
6  2.999495   -1.129820  1.115260
6  3.115943   -1.433955  -0.256449
6  3.102917   1.321410  -0.658473
6  2.726334   1.613403  0.669164
6  -2.473009   -0.804413  1.671902
6  -1.981758   0.479338  1.685322
6  -3.116467   1.165518  -0.898839
6  -3.811253   -0.044091  -0.797349
1  2.413831   -1.824784  1.727950
1  2.647914   -2.360370  -0.604320
1  2.671089   1.941769  -1.448351
1  2.020253   2.439552  0.815223
1  -1.795110   -1.603288  1.982356
1  -0.935398   0.623145  1.961982
1  -2.878452   1.513852  -1.909270
1  -4.039663   -0.556210  -1.734966
6  -3.930344   -1.189271  1.517970
6  -3.050193   2.241627  0.165233
1  -2.211896   2.904236  -0.087462
1  -3.961197   2.867619  0.111926
1  -3.965765   -2.266364  1.296082
1  -4.460749   -1.057792  2.479494
6  4.187127   -0.903681  -1.188087
6  3.508676   1.227211  1.909451
1  5.137782   -1.452329  -1.044003
1  3.862641   -1.121965  -2.218053
1  2.844812   1.378582  2.775533
1  4.369101   1.907140  2.060510
8  0.039109   -1.404129  0.109604
6  0.097801   -2.790855  -0.065772
1  0.075189   -3.079586  -1.133462
1  1.015480   -3.205506  0.388884
1  -0.760275   -3.280584  0.431867
6  4.398302   0.613205  -1.036985
1  4.777048   1.028561  -1.983358
1  5.174183   0.824874  -0.285947
6  3.973978   -0.243831  1.882700
1  4.978637   -0.324121  1.441026
1  4.069935   -0.616097  2.914081
8  -0.074671   1.192529  -0.447051
6  0.026129   2.133593  -1.469088
1  0.820182   2.876011  -1.261401
1  0.240329   1.683099  -2.458967
1  -0.910135   2.713816  -1.576085
7  -1.259181   -0.747388  -2.383448
1  -1.475263   0.096151  -2.924165
1  -0.234214   -0.790388  -2.405291
1  -2.446687   -1.686446  -0.572130
6  -2.848941   1.720943  1.603895
1  -3.820777   1.518237  2.077719
1  -2.382964   2.518074  2.202202
6  -4.676943   -0.425341  0.401243
1  -5.137429   0.488079  0.806388
1  -5.511071   -1.048353  0.045066

60
Structure BRh-NH3 electronic energy -1188.19411309
45  -1.823991   0.447692  -0.004268
45  1.823995   0.447698  0.004306
6  -2.071879   -1.532066  -0.819442
6  -1.765807   -1.606607  0.547400
6  -2.766317   -1.872984  1.655719
1  -3.021032   -2.949973  1.696373
1  -2.264230   -1.642074  2.608049
6  -3.704355   0.341898  0.875323
6  -3.810198   0.571083  -0.546250
6  -4.237902   -0.467056  -1.566758
1  -4.024841   -0.052412  -2.565597
1  -5.331076   -0.644544  -1.534153
6  3.810183   0.571025  0.546359
6  3.704385   0.342015  -0.875245
6  2.766378   -1.872769  -1.655951
1  2.264324   -1.641743  -2.608271
1  3.021094   -2.949753  -1.696726
6  1.765834   -1.606529  -0.547631
6  2.071864   -1.532169  0.819230
6  4.237863   -0.467244  1.566744
1  4.024772   -0.052731  2.565631
1  5.331039   -0.644724  1.534146
1  1.244036   -1.656655  1.520341
1  -1.244073   -1.656439  -1.520595
1  -0.726154   -1.809164  0.815091
1  -4.068150   1.595555  -0.851138
1  4.068126   1.595459  0.851384
1  3.899998   1.209828  -1.520410
1  0.726187   -1.809050  -0.815376
1  -3.899950   1.209628  1.520604
8  -0.065532   0.848539  -1.318002
8  0.065524   0.848396  1.318117
6  0.053893   0.470216  2.652494
1  -0.815427   0.903750  3.194933
1  -0.018161   -0.629477  2.802509
1  0.970411   0.794999  3.190917
6  -0.053945   0.470561  -2.652437
1  0.815329   0.904222  -3.194850
1  0.018174   -0.629106  -2.802619
1  -0.970505   0.795371  -3.190772
6  -3.459972   -1.782657  -1.394011
1  -3.362966   -2.293451  -2.364542
1  -4.010280   -2.477654  -0.741971
6  -4.028881   -1.000206  1.531854
1  -4.813426   -1.524167  0.962320
1  -4.454343   -0.831111  2.533126
6  3.459944   -1.782827  1.393800
1  4.010275   -2.477733  0.741680
1  3.362918   -2.293750  2.364261
6  4.028939   -1.000007  -1.531928
1  4.454444   -0.830789  -2.533161
1  4.813460   -1.524039  -0.962423
1  -1.409571   3.032824  -0.557743
7  -1.690629   2.549045  0.293918
1  -2.442794   3.057925  0.756401
1  -0.873756   2.406554  0.916627
7  1.690605   2.549086  -0.293626
1  0.873703   2.406632  -0.916310
1  2.442734   3.058030  -0.756094
1  1.409581   3.032763  0.558105
56
Structure C��Rh electronic energy 
-1131.62876360
45  1.638795   -0.024366  0.174583
45  -1.553620   -0.105628  -0.367540
6  3.228412   -1.301744  0.750319
6  3.015707   -1.379589  -0.644600
6  3.015093   1.405814  -0.598452
6  2.975341   1.473810  0.810218
6  -2.619777   -0.766246  1.583509
6  -2.549488   0.604081  1.627964
6  -3.179072   0.856655  -1.106407
6  -3.640563   -0.570872  -1.145791
1  2.782492   -2.092109  1.364478
1  2.446751   -2.240002  -1.012957
1  2.429494   2.148249  -1.150686
1  2.363413   2.268472  1.254226
1  -1.798477   -1.329447  2.033259
1  -1.663555   1.048740  2.085938
1  -3.003791   1.265822  -2.111009
1  -3.912861   -0.882906  -2.166709
6  -3.846885   -1.572935  1.195729
6  -3.803942   1.889396  -0.185515
1  -3.258716   2.831066  -0.357070
1  -4.853865   2.101755  -0.467453
1  -3.515473   -2.609487  1.024166
1  -4.543127   -1.620793  2.053425
6  3.866403   -0.708681  -1.705429
6  4.013334   0.893503  1.751421
1  4.806372   -1.270454  -1.868058
1  3.309271   -0.765737  -2.654230
1  3.579685   0.908295  2.763939
1  4.912932   1.537411  1.793103
8  0.099461   -1.366070  0.360244
6  0.102967   -2.728129  0.080191
1  0.113715   -2.944121  -1.008240
1  0.972386   -3.244133  0.533494
1  -0.804790   -3.209398  0.498430
6  4.157714   0.768793  -1.381203
1  4.315520   1.326393  -2.317055
1  5.096295   0.863737  -0.814369
6  4.394600   -0.556078  1.389694
1  5.262415   -0.570704  0.712753
1  4.714895   -1.088553  2.298223
8  -0.065017   1.196958  0.205593
6  -0.152463   2.519878  -0.228419
1  0.709987   3.105486  0.138335
1  -0.175880   2.607001  -1.332689
1  -1.065455   3.002766  0.167674
7  -0.767471   -0.232455  -2.213392
1  -0.675391   0.717195  -2.590059
1  0.205977   -0.529066  -2.074065
6  -3.714549   1.522954  1.313395
1  -4.649827   1.048992  1.648177
1  -3.615639   2.442937  1.909223
6  -4.599375   -1.093837  -0.064303
1  -5.335724   -0.313747  0.176462
1  -5.178327   -1.939186  -0.466722
1  -2.687577   -1.285280  -1.067779
